# Supplementary material for: Analysis of Criteria for Assessing Safety Distance for Focused Warhead Fragments Based on CDEM
Source: Hindawi journal article supplement (doi:10.1155/2019/8735481), 2019-01-01
Supplement: f1 [file 8735481.f1.zip › 8735481.f1/mat.8735481.v2 (1).docx]

|  | Manuscript | Journal | Pages | Authors | Publish year |  | Impact Factor | citation time | | |
| --- | --- | --- | --- | --- | --- | --- | --- | --- | --- | --- |
| SCI | SSCI | CSSCI |
| 1 | Investigations of Evaluating Energy of Blast-induced Seismic Wave by Pressure in Elastic Zone | Int.j.nonlinear Sci.numer.simul | (3):219-224 | Chen, Jian*; Bai, Chun-Hua; Zeng, Yi-Xin; Wang, Zhong-Qi; Li, Jian-Ping | 2012 | SCI | 0.89 | 0 |  |  |
| 2 | Critical energy of direct detonation initiation in gaseous fuel-oxygen mixtures | Safety Science | (2):153-159 | Zhang, Bo*; Bai, Chunhua | 2013 | SCI | 2.246 | 1 |  |  |
| 3 | Methane/coal dust/air explosions and their suppression by solid particle suppressing agents in a large-scale experimental tube | Journal of Loss Prevention in the Process Industries | (2):310-316 | Liu, Qingming*; Hu, Yongli; Bai, Chunhua; Chen, Mo | 2013 | SCI | 1.818 | 25 |  |  |
| 4 | Deflagration to detonation transition and detonation structure in diethyl ether mist/aluminum dust/air mixtures | Fuel | (9):400-408 | Bai, Chunhua; Zhang, Bo*; Xiu, Guangli; Liu, Qingming; Chen, Mo | 2013 | SCI | 4.601 | 5 |  |  |
| 5 | The critical energy of direct initiation and detonation cell size in liquid hydrocarbon fuel/air mixtures | Fuel | (113):331-339 | Yao, Ganbing; Zhang, Bo*; Xiu, Guangli; Bai, Chunhua; Liu, Peipei | 2013 | SCI | 4.601 | 5 |  |  |
| 6 | The origin of granular convection in vertically vibrated particle beds: The differential shear flow field | European Physical Journal E | (1):1-11 | Xue, Kun*; Zheng, Yixin; Fan, Baolong; Li, Fangfang; Bai, Chunhua | 2013 | SCI | 1.464 | 1 |  |  |
| 7 | Explosively driven fragmentation of granular materials | European Physical Journal E Soft Matter | (8):95 | Xue, Kun; Li, Fangfang; Bai, Chunhua | 2013 | SCI | 1.464 | 1 |  |  |
| 8 | Effect of explosive sources on the elastic wave field of explosions in soils | Defence Science Journal | (4):376-380 | Bai, Chun-Hua*; Chen, Jian; Zhang, Bo; Wang, Zhong-Qi | 2013 | SCI | 0.5 | 1 |  |  |
| 9 | Dual fragmentation modes of the explosively dispersed granular materials | European Physical Journal E | (9):1-12 | Xue, Kun*; Yu, Qiqi; Bai, Chunhua | 2014 | SCI |  | 0 |  |  |
| 10 | Methods to predict the critical energy of direct detonation initiation in gaseous hydrocarbon fuels – An overview | Fuel | 117(3):294-308 | Zhang, Bo*; Bai, Chunhua | 2014 | SCI | 4.601 | 2 |  |  |
| 11 | On the Dynamic Detonation Parameters in Acetylene-Oxygen Mixtures with Varying Amount of Argon Dilution | Combustion And Flame | (5):1390-1397 | Zhang, Bo*; Mehrjoo, Navid; Ng, Hoi Dick; Lee, John H. S. ; Bai, Chunhua | 2014 | SCI | 3.663 | 3 |  |  |
| 12 | Explosion characteristics of argon/nitrogen diluted natural gas–air mixtures | Fuel | (10):125-132 | Zhang, Bo*; Xiu, Guangli; Bai, Chunhua | 2014 | SCI | 4.601 | 22 |  |  |
| 13 | Improvement of a Gas Intake Device and a Gas Mixing Study in a Large‐Scale Vessel | Chemical Engineering & Technology | (10):1751-1756 | Bai, Chunhua; Fan, Baolong; Li, Bin* | 2014 | SCI | 2.051 | 0 |  |  |
| 14 | Explosion and flame characteristics of methane/air mixtures in a large‐scale vessel | Process Safety Progress | (4):362-368 | Zhang, Bo*; Bai, Chunhua; Xiu, Guangli; Liu, Qingming; Gong, Guangdong | 2014 | SCI | 0.812 | 11 |  |  |
| 15 | Study of the explosion parameters of vapor–liquid diethyl ether/air mixtures | Journal of Loss Prevention in the Process Industries | (38):139-147 | Bai, Chunhua; Wang, Yue* | 2015 | SCI | 1.818 | 0 |  |  |
| 16 | Influences of the Cloud Shape of Fuel-Air Mixtures on the Overpressure Field | Shock and Vibration | (1):1-7 | Bai, Chunhua; Wang, Ye*; Li, Jianping; Chen, Mingsheng | 2016 | SCI | 1.281 | 0 |  |  |
| 17 | 含铝炸药震源激发地震波能量的实验研究 | 北京理工大学学报 | (02):111-115 | 陈健*,白春华,胡立新,王仲琦,李建平,曾一鑫 | 2012 | EI | 0.697 |  |  |  |
| 18 | C2H2-2.5O2-Ar混合气体临界管径和爆轰胞格及临界能量的实验研究 | 北京理工大学学报 | (03):226-230 | 张博*,白春华,John H.S.LEE | 2012 | EI | 0.697 |  |  |  |
| 19 | C2H4-O2混合气体直接起爆的临界能量 | 爆炸与冲击 | (02):113-120 | 张博*,Lee J H S,白春华 | 2012 | EI | 0.890 |  |  |  |
| 20 | 中心药抛撒金属颗粒群的初速计算与实验研究 | 兵工学报 | (05):556-559 | 陈亚红*,白春华,刘意,李建平,王仲琦 | 2012 | EI | 1.204 |  |  |  |
| 21 | 甲烷/空气预混气的火焰传播过程 | 北京理工大学学报 | (05):441-445 | 牛芳,刘庆明*,白春华,何学秋,宫广东 | 2012 | EI | 0.697 |  |  |  |
| 22 | 巷道救生舱抗冲击数值仿真 | 煤炭学报 | (10):1705-1708 | 曾一鑫*,白春华,李建平,陈健,王仲琦 | 2012 | EI | 3.502 |  |  |  |
| 23 | C2H2-O2-Ar和C2H2-N2O-Ar直接起爆形成爆轰的临界能量 | 爆炸与冲击 | (06):592-598 | 张博*,白春华 | 2012 | EI | 0.890 |  |  |  |
| 24 | 粒子群投影寻踪算法在岩爆预测中的应用 | 上海交通大学学报 | (12):1956-1961+1966 | 周宣赤,白春华*,王仲琦,林大超 | 2012 | EI | 0.797 |  |  |  |
| 25 | 高电压点火有效能量的测量及相关问题 | 爆炸与冲击 | (01):85-90 | 张博*,白春华 | 2013 | EI | 0.890 |  |  |  |
| 26 | 消除EMD端点效应的PSO-SVM方法研究 | 系统工程理论与实践 | (05):1298-1306 | 白春华*,周宣赤,林大超,王仲琦 | 2013 | EI | 2.174 |  |  |  |
| 27 | 基于LMD-SVM的采煤工作面瓦斯涌出量预测 | 采矿与安全工程学报 | (06):946-952 | 樊保龙*,白春华,李建平 | 2013 | EI | 2.146 |  |  |  |
| 28 | 流固耦合方法在侵彻弹体磨蚀研究中的应用 | 爆炸与冲击 | (S1):16-22 | 浦锡锋*,王仲琦,白春华,周刚 | 2013 | EI | 0.890 |  |  |  |
| 29 | 爆炸驱动颗粒射流形成与演化的实验研究 | 振动与冲击 | (07):126-132+146 | 薛琨*,许俊彪,白春华 | 2014 | EI | 1.224 |  |  |  |
| 30 | 基于HHT研究房屋结构对爆炸地震的振动响应 | 振动与冲击 | (15):71-75 | 曾一鑫*,白春华,王仲琦 | 2014 | EI | 1.224 |  |  |  |
| 31 | 炸药性能对地震波品质影响的Hilbert-Huang变换分析 | 北京理工大学学报 | (12):1234-1239 | 白春华,曾一鑫*,王仲琦,陈健 | 2014 | EI | 0.697 |  |  |  |
| 32 | 燃料抛撒的初始速率与结构动态响应数值模拟 | 含能材料 | (04):323-329 | 陈明生*,白春华,李建平 | 2015 | EI | 1.047 |  |  |  |
| 33 | 非圆截面云雾爆炸超压场数值模拟 | 含能材料 | (05):484-489 | 陈明生*,李建平,白春华 | 2015 | EI | 1.047 |  |  |  |
| 34 | 正癸烷云雾气液两相浓度对其燃爆参数的影响 | 含能材料 | (07):663-669 | 王悦*,白春华,李斌,刘雪岭,张奇 | 2015 | EI | 1.047 |  |  |  |
| 35 | 密闭空间瞬态液雾粒径及浓度测量实验研究 | 兵工学报 | (09):1665-1670 | 王悦*,白春华,李斌,刘雪岭 | 2015 | EI | 1.204 |  |  |  |
| 36 | 多点云雾爆炸波相互作用的数值模拟 | 爆炸与冲击 | (01):81-86 | 陈明生*,白春华,李建平 | 2016 | EI | 0.890 |  |  |  |
| 37 | 乙醚云雾场燃爆参数实验研究 | 爆炸与冲击 | (04):497-502 | 王悦*,白春华 | 2016 | EI | 0.890 |  |  |  |
| 38 | 弹壳体结构对燃料装药抛撒速率影响的数值模拟研究 | 兵工学报 | (01):43-49 | 王晔*,白春华,李建平 | 2017 | EI | 1.204 |  |  |  |
| 39 | 非对称云雾爆炸超压场数值模拟 | 兵工学报 | (05):910-916 | 王晔*,白春华,李建平,陈风云 | 2017 | EI | 1.204 |  |  |  |
| 40 | 发射药生产过程中静电锥体放电规律数值模拟研究 | 兵工学报 | (05):892-899 | 卫水爱*,白春华,李春光 | 2017 | EI | 1.204 |  |  |  |
| 41 | 动态云雾形成及爆轰场特性 | 含能材料 | (06):466-471 | 王晔*,白春华,李建平 | 2017 | EI | 1.047 |  |  |  |
| 42 | 火炸药粉体静电带电监测方法对比实验研究 | 含能材料 | (06):515-519 | 卫水爱*,白春华 | 2017 | EI | 1.047 |  |  |  |
| 43 | 炸药土中爆炸弹性区应力波的测试与分析 | 科技导报 | (03):26-29 | 严峰*,张庆明,白春华,陈健,王仲琦,李建平 | 2012 | 否 | 0.797 |  |  |  |
| 44 | 高浓度氩气稀释对C2H2-2.5O2气体直接起爆临界能量影响的实验研究 | 高压物理学报 | (01):55-62 | 张博*,Lee John H S,白春华 | 2012 | 否 | 0.579 |  |  |  |
| 45 | 铝粉-空气混合物爆燃转爆轰过程及爆轰波结构 | 高压物理学报 | (04):426-432 | 陈默,白春华,刘庆明* | 2012 | 否 | 0.579 |  |  |  |
| 46 | 甲烷-煤尘爆炸物火焰传播特性 | 高压物理学报 | (04):455-461 | 牛芳,刘庆明*,白春华,何学秋,宫广东 | 2012 | 否 | 0.579 |  |  |  |
| 47 | 基于改进EMD的爆炸微差延期时间尺度识别及应用 | 控制工程 | (06):1038-1041+1046 | 周宣赤*,白春华,王仲琦,林大超 | 2012 | 否 | 1.038 |  |  |  |
| 48 | 竖直振动颗粒床对流机制的颗粒尺度实验研究 | 实验力学 | (03):290-298 | 李芳芳,薛琨*,白春华 | 2012 | 否 | 0.632 |  |  |  |
| 49 | 一种新的冲击波超压测试方法——压力响应膜片 | 中国水运(下半月) | (01):104-106 | 陈昌明*,李建平,白春华 | 2013 | 否 | 0.104 |  |  |  |
| 50 | HHT分析在地震信号处理中的应用 | 控制工程 | (01):141-144 | 周宣赤*,白春华,林大超,王仲琦 | 2013 | 否 | 1.038 |  |  |  |
| 51 | C2H2-O2-Ar混合气体爆轰特征参数研究 | 高压物理学报 | (02):287-291 | 张博*,白春华 | 2013 | 否 | 0.579 |  |  |  |
| 52 | 入水问题的Euler-Lagrange流固耦合数值模拟技术研究 | 计算力学学报 | (S1):159-163 | 浦锡锋*,王仲琦,白春华 | 2013 | 否 | 0.648 |  |  |  |
| 53 | 矿用救生舱焊接部位数值模拟处理方法 | 煤矿安全 | (06):101-103 | 张婷*,李建平,白春华 | 2013 | 否 | 0.603 |  |  |  |
| 54 | H2-O2/Air直接起爆形成爆轰临界能量的预测模型 | 高压物理学报 | (05):719-724 | 张博*,白春华 | 2013 | 否 | 0.579 |  |  |  |
| 55 | 含铝炸药震源激发地震波的数值模拟 | 高压物理学报 | (06):872-876 | 曾一鑫*,白春华,陈健,王仲琦 | 2014 | 否 | 0.579 |  |  |  |
| 56 | Link-Interface技术在救生舱数值检测中的应用 | 高压物理学报 | (01):86-90 | 曾一鑫*,白春华,李建平,陈健,王仲琦 | 2014 | 否 | 0.579 |  |  |  |
| 57 | 大尺寸密闭空间内甲烷—空气混合过程的数值模拟 | 爆破器材 | (02):5-9 | 王博*,李斌,樊保龙,白春华 | 2014 | 否 | 0.526 |  |  |  |
| 58 | 迎爆面结构对救生舱抗爆性能的影响 | 矿业安全与环保 | (03):47-50 | 施龙*,李建平,白春华,王川 | 2014 | 否 | 0.960 |  |  |  |
| 59 | 加强肋结构对救生舱抗爆性能影响 | 煤矿机械 | (06):90-92 | 王川*,李建平,施龙,白春华 | 2014 | 否 | 0.281 |  |  |  |
| 60 | 气相爆轰动力学特征研究进展 | 中国科学:物理学 力学 天文学 | (07):665-681 | 张博*,白春华 | 2014 | 否 | 0.840 |  |  |  |
| 61 | 中心药爆炸抛撒金属颗粒群的速度分布 | 弹道学报 | (02):51-54 | 陈亚红*,白春华 | 2015 | 否 | 0.942 |  |  |  |
| 62 | 二次脉冲气动喷雾系统的设计与实验研究 | 高压物理学报 | (05):347-355 | 王悦*,白春华,李斌,张奇,刘雪岭 | 2015 | 否 | 0.579 |  |  |  |
| 63 | 近地面爆源爆炸成坑效应的数值模拟研究 | 爆破器材 | (03):31-35 | 陈风云*,白春华 | 2016 | 否 | 0.526 |  |  |  |
| 64 | 大尺寸密闭空间内甲烷-空气二元混合方法的改进与评定 | 高压物理学报 | (03):242-248 | 樊保龙*,李斌,白春华,王博 | 2016 | 否 | 0.579 |  |  |  |
| 65 | 云雾爆轰 | 科学出版社 |  | 白春华，梁慧敏，李建平，张奇 | 2012 |  |  |  |  |  |
| 66 | 气相爆轰动力学 | 科学出版社 |  | 张博，白春华 | 2012 |  |  |  |  |  |
