# Supplementary material for: Analysis of Criteria for Assessing Safety Distance for Focused Warhead Fragments Based on CDEM
Source: Hindawi journal article supplement (doi:10.1155/2019/8735481), 2019-01-01
Supplement: f1 [file 8735481.f1.zip › 8735481.f1/Supplementary Material (1).docx]

*Safety distance with different specific kinetic energy lethality criteria (for Fig 12 in text)*
